# Supplementary material for: Prevalence and Factors Associated With Vaping Cannabidiol Among US Adolescents
Source: PubMed Central journal article supplement (PMC10433080; doi:10.1001/jamanetworkopen.2023.29167), 2023-08-16
Supplement: jamanetwopen-e2329167-s001.pdf [file jamanetwopen-e2329167-s001.pdf]

## Supplemental Online Content

Dai HD, Subramanian R, Mahroke A, Wang M. Prevalence and factors associated with vaping cannabidiol among US adolescents. *JAMA Netw Open*. 2023;6(8):e2329167. doi:10.1001/jamanetworkopen.2023.29167

**eTable 1.** Factors Correlated With Ever Vaping CBD Among Never E-cigarette Users

**eTable 2.** Factors Correlated With Ever Vaping CBD Among Ever E-cigarette Users

This supplemental material has been provided by the authors to give readers additional information about their work.

**eTable 1. Factors Correlated with Ever Vaping CBD among Never E-cigarette Users**

|                                            |               | Ever Vaping CBD               |                   |                  |                      |                     |                      |
|--------------------------------------------|---------------|-------------------------------|-------------------|------------------|----------------------|---------------------|----------------------|
|                                            |               | Prevalence of Ever Vaping CBD |                   | Yes vs. No       |                      | I don't know vs. No |                      |
|                                            |               | Yes                           | Don't Know        | AOR <sup>a</sup> | P-value <sup>a</sup> | AOR <sup>a</sup>    | P-value <sup>a</sup> |
|                                            |               | 2.1 (1.7 to 2.5)              | 4.6 (4.1 to 5.2)  |                  |                      |                     |                      |
| <b>Sex</b>                                 |               |                               |                   |                  |                      |                     |                      |
|                                            | Male          | 1.8 (1.4 to 2.2)              | 5.0 (4.4 to 5.6)  | Ref              | Ref                  | Ref                 | Ref                  |
|                                            | Female        | 2.4 (1.9 to 3.0)              | 4.1 (3.4 to 4.8)  | 1.2 (0.9 to 1.5) | 0.19                 | 0.8 (0.7 to 0.9)    | 0.01                 |
| <b>Grade</b>                               |               |                               |                   |                  |                      |                     |                      |
|                                            | Middle School | 0.9 (0.7 to 1.2)              | 5.4 (4.7 to 6.1)  | Ref              | Ref                  | Ref                 | Ref                  |
|                                            | High School   | 3.3 (2.7 to 3.9)              | 3.8 (3.1 to 4.5)  | 3.6 (2.6 to 4.8) | <.0001               | 0.7 (0.6 to 0.9)    | 0.001                |
| <b>Race / Ethnicity</b>                    |               |                               |                   |                  |                      |                     |                      |
|                                            | NH-white      | 1.7 (1.3 to 2.2)              | 3.6 (3.0 to 4.2)  | Ref              | Ref                  | Ref                 | Ref                  |
|                                            | NH-black      | 3.1 (2.2 to 4.0)              | 5.1 (4.1 to 6.2)  | 1.6 (1.1 to 2.4) | 0.01                 | 1.4 (1.1 to 1.8)    | 0.01                 |
|                                            | Hispanic      | 2.9 (2.1 to 3.7)              | 6 (4.8 to 7.3)    | 1.8 (1.1 to 2.8) | 0.01                 | 1.4 (1.1 to 1.9)    | 0.01                 |
|                                            | Others        | 1.1 (0.4 to 1.8)              | 4.6 (3.3 to 5.9)  | 0.7 (0.3 to 1.7) | 0.47                 | 1.1 (0.8 to 1.5)    | 0.60                 |
| <b>Sexual Minority</b>                     |               |                               |                   |                  |                      |                     |                      |
|                                            | Heterosexual  | 1.7 (1.3 to 2.1)              | 4.0 (3.5 to 4.5)  | Ref              | Ref                  | Ref                 | Ref                  |
|                                            | Gay/Lesbian   | 3.1 (1.3 to 4.9)              | 3.8 (2.4 to 5.1)  | 1.8 (1.2 to 2.9) | 0.01                 | 1.2 (0.8 to 1.9)    | 0.32                 |
|                                            | Bisexual      | 3.7 (2.5 to 4.9)              | 4.7 (3.2 to 6.2)  | 2.0 (1.3 to 3.0) | 0.00                 | 1.3 (0.9 to 1.8)    | 0.15                 |
|                                            | Unsure        | 1.6 (0.9 to 2.3)              | 6.5 (4.7 to 8.3)  | 1.0 (0.6 to 1.7) | 0.85                 | 1.5 (1.1 to 2.0)    | 0.01                 |
| <b>Language other than English at home</b> |               |                               |                   |                  |                      |                     |                      |
|                                            | No            | 2.0 (1.5 to 2.4)              | 3.6 (3.1 to 4.2)  | Ref              | Ref                  | Ref                 | Ref                  |
|                                            | Yes           | 1.8 (1.3 to 2.4)              | 6.0 (5.0 to 6.9)  | 0.9 (0.6 to 1.3) | 0.48                 | 1.3 (1.04 to 1.71)  | 0.02                 |
| <b>Perceived Tobacco Danger</b>            |               |                               |                   |                  |                      |                     |                      |
|                                            | No            | 4.1 (3.0 to 5.3)              | 9.6 (7.9 to 11.4) | Ref              | Ref                  | Ref                 | Ref                  |
|                                            | Yes           | 1.7 (1.4 to 2.1)              | 3.8 (3.3 to 4.3)  | 0.5 (0.3 to 0.6) | <.0001               | 0.4 (0.3 to 0.5)    | <.0001               |

Abbreviations, CI: Confidence Interval; AOR: Adjusted Odds Ratio; NH: non-Hispanic.

\*: Multinomial logistic regression model included current vaping CBD (no as the reference group) as the outcome variable with all variables in this Table as simultaneous regressors. Missing covariate data were managed with multiple imputation using 20 multiply-imputed data sets.

**eTable 2. Factors Correlated with Ever Vaping CBD among Ever E-cigarette Users**

|                                            |               | Ever Vaping CBD               |                     |                  |                      |                     |                      |
|--------------------------------------------|---------------|-------------------------------|---------------------|------------------|----------------------|---------------------|----------------------|
|                                            |               | Prevalence of Ever Vaping CBD |                     | Yes vs. No       |                      | I don't know vs. No |                      |
|                                            |               | Yes                           | Don't Know          | AOR <sup>a</sup> | P-value <sup>a</sup> | AOR <sup>a</sup>    | P-value <sup>a</sup> |
|                                            |               | 27.4 (25.2 to 29.7)           | 11.1 (9.5 to 12.6)  |                  |                      |                     |                      |
| <b>Sex</b>                                 |               |                               |                     |                  |                      |                     |                      |
|                                            | Male          | 25.6 (22.5 to 28.7)           | 10.7 (8.8 to 12.7)  | Ref              | Ref                  | Ref                 | Ref                  |
|                                            | Female        | 28.8 (25.7 to 32.0)           | 11.3 (9.3 to 13.2)  | 1.4 (1.1 to 1.8) | 0.02                 | 1.1 (0.8 to 1.4)    | 0.53                 |
| <b>Grade</b>                               |               |                               |                     |                  |                      |                     |                      |
|                                            | Middle School | 18.7 (14.4 to 23.0)           | 18.2 (13.8 to 22.5) | Ref              | Ref                  | Ref                 | Ref                  |
|                                            | High School   | 29.3 (27.1 to 31.5)           | 9.3 (7.8 to 10.8)   | 1.5 (1.1 to 1.9) | 0.01                 | 0.6 (0.4 to 0.8)    | 0.003                |
| <b>Race / Ethnicity</b>                    |               |                               |                     |                  |                      |                     |                      |
|                                            | NH-white      | 27.0 (24.1 to 29.9)           | 9.1 (7.4 to 10.8)   | Ref              | Ref                  | Ref                 | Ref                  |
|                                            | NH-black      | 32.2 (27.7 to 36.8)           | 11.2 (7.6 to 14.8)  | 1.4 (1.0 to 2.0) | 0.05                 | 1.3 (0.8 to 2.0)    | 0.31                 |
|                                            | Hispanic      | 27.5 (23.8 to 31.3)           | 15.8 (12.8 to 18.8) | 1.2 (0.9 to 1.6) | 0.16                 | 1.6 (1.1 to 2.3)    | 0.01                 |
|                                            | Others        | 23.4 (14.7 to 32.1)           | 8.9 (4.0 to 13.8)   | 0.9 (0.5 to 1.6) | 0.77                 | 0.8 (0.4 to 1.6)    | 0.50                 |
| <b>Sexual Minority</b>                     |               |                               |                     |                  |                      |                     |                      |
|                                            | Heterosexual  | 25.1 (22.6 to 27.7)           | 10.6 (8.5 to 12.7)  | Ref              | Ref                  | Ref                 | Ref                  |
|                                            | Gay/Lesbian   | 30.4 (20.7 to 40.0)           | 11.2 (4.4 to 18.1)  | 1.1 (0.7 to 1.7) | 0.60                 | 1.0 (0.6 to 1.7)    | 0.93                 |
|                                            | Bisexual      | 29.3 (24.7 to 33.9)           | 12.2 (8.1 to 16.4)  | 1.2 (0.9 to 1.6) | 0.28                 | 1.1 (0.7 to 1.8)    | 0.71                 |
|                                            | Unsure        | 32.7 (24.4 to 41.1)           | 13.0 (6.5 to 19.6)  | 1.4 (0.9 to 2.0) | 0.13                 | 1.2 (0.6 to 2.5)    | 0.56                 |
| <b>Language other than English at home</b> |               |                               |                     |                  |                      |                     |                      |
|                                            | No            | 26.5 (24 to 29.1)             | 9.4 (7.7 to 11.0)   | Ref              | Ref                  | Ref                 | Ref                  |
|                                            | Yes           | 25 (20.9 to 29.1)             | 15.8 (12 to 19.7)   | 1.1 (0.8 to 1.5) | 0.63                 | 1.3 (0.9 to 1.9)    | 0.20                 |
| <b>Perceived Tobacco Danger</b>            |               |                               |                     |                  |                      |                     |                      |
|                                            | No            | 34.1 (29.0 to 39.1)           | 10.4 (7.6 to 13.3)  | Ref              | Ref                  | Ref                 | Ref                  |
|                                            | Yes           | 25.0 (22.5 to 27.4)           | 11.2 (9.3 to 13.0)  | 0.7 (0.6 to 0.9) | 0.02                 | 1.0 (0.7 to 1.4)    | 0.93                 |
| <b>Tried Vaping (years)</b>                |               |                               |                     |                  |                      |                     |                      |
|                                            | <1            | 11.3 (8.2 to 14.4)            | 16.9 (13.3 to 20.5) | Ref              | Ref                  | Ref                 | Ref                  |

|                                    |     |                     |                    |                  |        |                  |       |
|------------------------------------|-----|---------------------|--------------------|------------------|--------|------------------|-------|
|                                    | 1   | 22.6 (19.1 to 26.0) | 10.0 (7.4 to 12.6) | 2.1 (1.4 to 3.0) | 0.0002 | 0.7 (0.5 to 0.9) | 0.02  |
|                                    | 2-3 | 30.3 (26.6 to 34.1) | 10.1 (7.7 to 12.6) | 2.7 (1.9 to 4.0) | <.0001 | 0.8 (0.5 to 1.2) | 0.28  |
|                                    | >3  | 41.9 (38.0 to 45.7) | 9.7 (6.5 to 12.9)  | 4.1 (2.8 to 6.0) | <.0001 | 0.9 (0.6 to 1.4) | 0.61  |
| <hr/>                              |     |                     |                    |                  |        |                  |       |
| Ever use of other tobacco products |     |                     |                    |                  |        |                  |       |
|                                    | No  | 16.9 (13.9 to 19.8) | 10.6 (8.9 to 12.3) | Ref              | Ref    | Ref              | Ref   |
|                                    | Yes | 37.5 (34.5 to 40.5) | 11.5 (9.2 to 13.9) | 2.7 (2.1 to 3.4) | <.0001 | 1.6 (1.2 to 2.1) | 0.002 |

Abbreviations, CI: Confidence Interval; AOR: Adjusted Odds Ratio; NH: non-Hispanic.

<sup>a</sup>: Multinomial logistic regression model included current vaping CBD (no as the reference group) as the outcome variable with all variables in this Table as simultaneous regressors. Missing covariate data were managed with multiple imputation using 20 multiply-imputed data sets.
