# Supplementary material for: Prevalence and Factors Associated With Vaping Cannabidiol Among US Adolescents
Source: PubMed Central journal article supplement (PMC10433080; doi:10.1001/jamanetworkopen.2023.29167), 2023-08-16
Supplement: jamanetwopen-e2329167-s002.pdf [file jamanetwopen-e2329167-s002.pdf]

## Data Sharing Statement

Dai. Prevalence and Factors Associated With Vaping Cannabidiol Among US Adolescents. *JAMA Netw Open*. Published August 16, 2023. doi:10.1001/jamanetworkopen.2023.29167

### Data

**Data available:** Yes

**Data types:** Deidentified participant data

**How to access data:** This is the secondary analysis of publicly available data, which can be accessed at [https://www.cdc.gov/tobacco/data\\_statistics/surveys/nyts/index.htm](https://www.cdc.gov/tobacco/data_statistics/surveys/nyts/index.htm).

**When available:** With publication

### Supporting Documents

**Document types:** Other (please specify)

**Additional Information:** This is the secondary analysis of publicly available data, which can be accessed at [https://www.cdc.gov/tobacco/data\\_statistics/surveys/nyts/index.htm](https://www.cdc.gov/tobacco/data_statistics/surveys/nyts/index.htm).

**How to access documents:** Dataset and codebook

**When available:** With publication

### Additional Information

**Who can access the data:** anyone

**Types of analyses:** This is the secondary analysis of publicly available data, which can be accessed at [https://www.cdc.gov/tobacco/data\\_statistics/surveys/nyts/index.htm](https://www.cdc.gov/tobacco/data_statistics/surveys/nyts/index.htm).

**Mechanisms of data**

**availability:** [https://www.cdc.gov/tobacco/data\\_statistics/surveys/nyts/index.htm](https://www.cdc.gov/tobacco/data_statistics/surveys/nyts/index.htm).
